# Supplementary material
Source: Springer Nature journal article supplement (https://www.springermedizin.de/resource/supplementary/13002_2009_172_MOESM4_ESM.pdf/9627312)

### Brea de Tajo

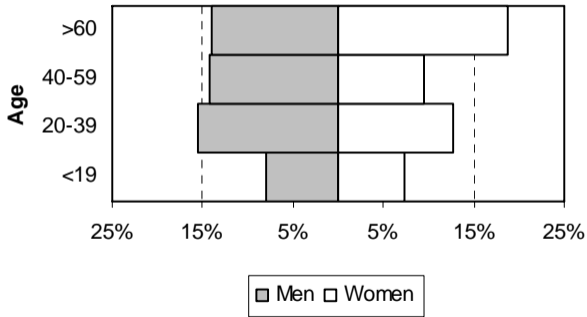

### Canencia

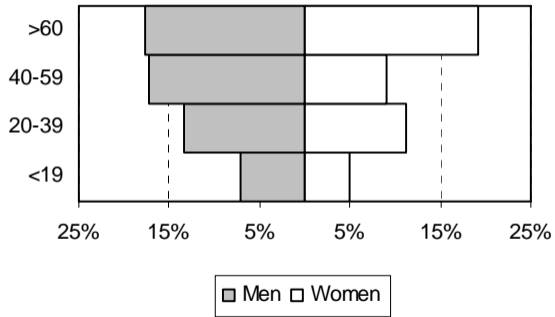

Supplement: MOESM4 [file 9627312]
